# Supplementary material
Source: Springer Nature journal article supplement (https://www.springermedizin.de/resource/supplementary/12876_2010_477_MOESM6_ESM.pdf/9437094)

**A.** Day 2 post-CCl<sub>4</sub>

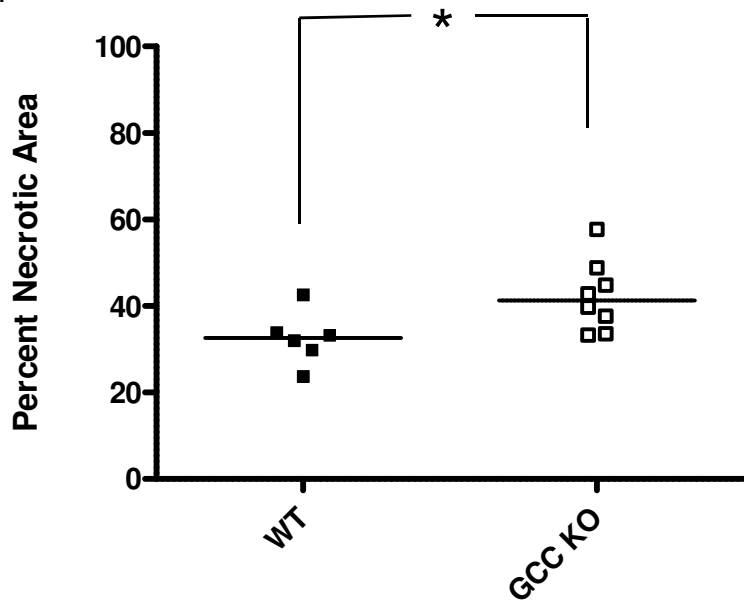

**B.** Day 3 post-CCl<sub>4</sub>

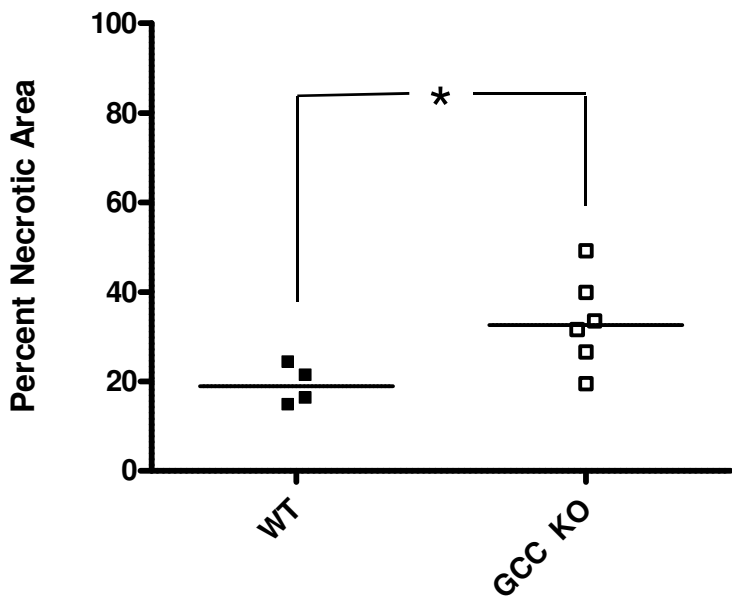

Supplement: MOESM6 [file 9437094]
